# Supplementary material for: Temperature promotes selectivity during electrochemical CO2 reduction on NiO:SnO2 nanofibers
Source: Royal Society of Chemistry journal article supplement (doi:10.1039/d4ta04116j), 2024-01-01
Supplement: d4ta04116j1.pdf [file d4ta04116j1.pdf]

# 1 **Temperature Promotes Selectivity During Electrochemical CO<sub>2</sub>**

## 2 **Reduction on NiO:SnO<sub>2</sub> Nanofibers**

3 M. A. Rodriguez-Olguin,<sup>#</sup> R. Lipin,<sup>#</sup> M. Suominen, F. Ruiz-Zepeda, E. Castañeda-Morales, A. Manzo-  
4 Robledo, J.G.E. Gardeniers, C. Flox,<sup>\*</sup> T. Kallio,<sup>\*</sup> M. Vandichel,<sup>\*</sup> A. Susarrey-Arce<sup>\*</sup>

5 <sup>#</sup>These authors contributed equally to this work

6 <sup>\*</sup>Corresponding author(s): cristina.flox@ciiac.org; tanja.kallio@aalto.fi; matthias.vandichel@ul.ie;

7 a.susarreyarce@utwente.nl

## 8 1. Ni- and NiO electrocatalysts

| Compound                                  | Synthesis Method             | Main product                  | Electrolyte                           | FE    | E (vs RHE) | $J_{\text{HCOO}^-}$ (mA/cm <sup>2</sup> ) | T (°C) | Reference |
|-------------------------------------------|------------------------------|-------------------------------|---------------------------------------|-------|------------|-------------------------------------------|--------|-----------|
| NiO@CI-9%                                 | Electrospinning              | HCOO <sup>-</sup>             | 0.1M KHCO <sub>3</sub>                | 70%   | -0.8 V     | 14.7                                      | 25     | 1         |
| Ni-N-C                                    | In situ carbonization        | CO                            | 0.1 M KHCO <sub>3</sub>               | 90%   | -0.8V      | 5.0 (for CO)                              | 25     | 2         |
| Ni atomic/carbon                          | Pyrolysis                    | CO                            | 0.5 M KHCO <sub>3</sub>               | 90%   | -1.0 V     | 57.1 (for CO)                             | 25     | 3         |
| Ni single atoms/CNF                       | Electrospinning              | CO                            | 0.5M KHCO <sub>3</sub>                | 88%   | -1.0 V     | 308.4 (for CO)                            | 25     | 4         |
| Ni/NiO/g-C <sub>3</sub> N <sub>4</sub>    | Photocatalytic reduction     | CO                            | 0.5 M Na <sub>2</sub> SO <sub>4</sub> | 87%   | -0.3 V     | 7.8 $\mu\text{A}/\text{cm}^2$             | 25     | 5         |
| NiO doped Zn <sup>2+</sup>                | Combustion synthesis         | C <sub>2</sub> H <sub>4</sub> | 0.5 M NaHCO <sub>3</sub>              | 47%   | -0.79 V    | N.R.                                      | 25     | 6         |
| Ni-N <sub>3</sub>                         | Impregnation, ZIF formation  | CO                            | 0.5 M KHCO <sub>3</sub>               | 95%   | -1.0 V     | 27                                        | 25     | 7         |
| Ni-N doped CNT                            | CVD                          | CO                            | 0.5 KHCO <sub>3</sub>                 | 91%   | -0.74 V    | 29                                        | 25     | 8         |
| Ni single atoms-N-C                       | Ball-milling, pyrolysis      | CO                            | 0.1 KHCO <sub>3</sub>                 | 93%   | -1.3 V     | 16.5                                      | 25     | 9         |
| Ni-N <sub>4-x</sub> -C <sub>x</sub>       | Pyrolysis                    | CO                            | Humidified CO <sub>2</sub>            | 99%   | -2.0 V     | 470                                       | 25     | 10        |
| Co-N-Ni                                   | Sonochemistry                | CO                            | 0.1 M KHCO <sub>3</sub>               | 94.6% | - 370 mV   | 1.7                                       | 25     | 11        |
| Ni/Ni <sub>3</sub> ZnC <sub>0.7</sub> -NC | Hydrothermal                 | CO                            | 0.5 KHCO <sub>3</sub>                 | 92.5% | - 0.87 V   | 15.77                                     | 25     | 12        |
| NiN <sub>x</sub> /NCNT                    | Ball-milling, annealing      | CO                            | 1 M KOH                               | 99%   | -0.272 V   | 85.6                                      | 25     | 13        |
| Ni-N <sub>4</sub> in mesoporus carbon     | Solvent drying and annealing | CO                            | 0.5 KHCO <sub>3</sub>                 | 95%   | -0.8 V     | 366                                       | 25     | 14        |
| Ni single atom/Ni NP/MOF                  | Pyrolysis                    | CO                            | 1 M KOH                               | 99%   | -1.82 V    | 160                                       | 25     | 15        |
| CuZn-Ni aerogel                           | Aerogel synthesis            | CO                            | 1M KOH                                | 80%   | -0.8 V     | 20.0                                      | 25     | 16        |
| Ni-SAC-nano array                         | Hydrothermal, annealing      | CO                            | 0.5 KHCO <sub>3</sub>                 | 90%   | -1.0 V     | 66.0                                      | 25     | 17        |

9 Table S1. Ni/NiO electrocatalyst used for formate and other products during CO<sub>2</sub>RR.

## 11 2. Sn and SnO<sub>2</sub> electrocatalysts

12 **Table S2.** Sn/SnO<sub>2</sub> electrocatalyst for formate formation during CO<sub>2</sub>RR.

| Compound                                       | Synthesis Method  | Main product      | Electrolyte             | FE    | E (vs RHE)     | J <sub>HCOO-</sub> (mA/cm <sup>2</sup> ) | T (°C) | Reference |
|------------------------------------------------|-------------------|-------------------|-------------------------|-------|----------------|------------------------------------------|--------|-----------|
| <b>SnO<sub>2</sub>-Cl doped</b>                | Sonochemistry     | HCOO <sup>-</sup> | 2M KHCO <sub>3</sub>    | 59.1% | 1.3            | 32.6                                     | 25     | 18        |
| <b>Anodic SnO<sub>2</sub></b>                  | Anodic oxidation  | HCOO <sup>-</sup> | 0.5M KHCO <sub>3</sub>  | 73%   | 0.8            | 10                                       | 25     | 19        |
| <b>Mn-doped atomic SnO<sub>2</sub> layers</b>  | Hydrothermal      | HCOO <sup>-</sup> | 0.1M KHCO <sub>3</sub>  | 75%   | 1.03           | 21.2                                     | 25     | 20        |
| <b>Zn-Sn oxides</b>                            | Biomineralization | HCOO <sup>-</sup> | 0.1M KHCO <sub>3</sub>  | 70%   | -1.1 V         | 8.4 (for CO + HCOOH)                     | 25     | 21        |
| <b>SnO<sub>2</sub>/C</b>                       | Impregnation      | HCOO <sup>-</sup> | 0.5 M KHCO <sub>3</sub> | 92%   | 0.86 V         | 29                                       | 25     | 22        |
| <b>Sn-halogen incorporated</b>                 | Hydrolysis        | HCOO <sup>-</sup> | 0.5 M KHCO <sub>3</sub> | 96%   | -0.9 V         | 62.4                                     | 25     | 23        |
| <b>SnO nanosheets</b>                          | Precipitation     | HCOO <sup>-</sup> | 1M KOH                  | 94%   | 0.7V           | 330                                      | 25     | 24        |
| <b>SnO<sub>2</sub>/GO</b>                      | Hydrothermal      | HCOO <sup>-</sup> | 0.1M KHCO <sub>3</sub>  | 84.4% | 0.96V          | 4.5                                      | 25     | 25        |
| <b>VO-rich N-SnO<sub>2</sub></b>               | Hydrothermal      | HCOO <sup>-</sup> | 0.1M KHCO <sub>3</sub>  | 83%   | 0.9V           | 10                                       | 25     | 26        |
| <b>Ov-engineered SnO<sub>2</sub></b>           | Thermal treatment | HCOO <sup>-</sup> | 1 M KHCO <sub>3</sub>   | 80%   | -0.9 V         | 16.6                                     | 25     | 27        |
| <b>B-doped SnO<sub>2</sub></b>                 | Hydrothermal      | HCOO <sup>-</sup> | 0.5M KHCO <sub>3</sub>  | 95%   | 1.0 V          | 43.2                                     | 25     | 28        |
| <b>SnO<sub>2</sub> nanosheets</b>              | Solvothermal      | HCOO <sup>-</sup> | 0.1M NaHCO <sub>3</sub> | 83%   | 320 mV         | 16                                       | 25     | 29        |
| <b>SnO<sub>2</sub>/OC</b>                      | Hydrothermal      | HCOO <sup>-</sup> | 0.1M KHCO <sub>3</sub>  | 75%   | 1.29 V         | 13.4                                     | 25     | 30        |
| <b>SnO<sub>x</sub></b>                         | Deposition        | HCOO <sup>-</sup> | 0.5M KHCO <sub>3</sub>  | 69%   | 1.0            | 53                                       | 25     | 31        |
| <b>Wavy SnO<sub>2</sub></b>                    | Hydrothermal      | HCOO <sup>-</sup> | 0.5M KHCO <sub>3</sub>  | 22%   | 1.0 V          | 87                                       | 25     | 32        |
| <b>Porous SnO<sub>2</sub> nanosheets</b>       | CVD               | HCOO <sup>-</sup> | 0.5M KHCO <sub>3</sub>  | 94%   | 0.51 V         | 18.8                                     | 25     | 33        |
| <b>Chainlike Mesoporous SnO<sub>2</sub></b>    | Anodic oxidation  | HCOO <sup>-</sup> | 0.1M KHCO <sub>3</sub>  | 82%   | 1.06 V         | 15.3                                     | 25     | 34        |
| <b>SnO<sub>2</sub>-GQDs</b>                    | Hydrothermal      | HCOO <sup>-</sup> | 0.1M KHCO <sub>3</sub>  | 93%   | 1.3V           | 16.2                                     | 25     | 35        |
| <b>SnO<sub>x</sub> Nanosheets-MWCNTs</b>       | Hydrothermal      | HCOO <sup>-</sup> | 0.5M KHCO <sub>3</sub>  | 77%   | 1.25V (vs SHE) | 11.0                                     | 25     | 36        |
| <b>Double-shell SnO<sub>x</sub> nanosphere</b> | Hydrothermal      | HCOO <sup>-</sup> | 0.5M KHCO <sub>3</sub>  | 81%   | 1.15 V         | 44.7                                     | 25     | 37        |
| <b>1D SnO<sub>2</sub></b>                      | Electrospinning   | HCOO <sup>-</sup> | 0.1M KHCO <sub>3</sub>  | 70%   | 1.29 V         | 12.0                                     | 25     | 38        |
| <b>Sn/SnO<sub>2</sub> nanofiber</b>            | Electrospinning   | HCOO <sup>-</sup> | 0.1M KHCO <sub>3</sub>  | 82.1% | 1.6 V (vs SCE) | 22.9                                     | 25     | 39        |

13

14 **3. Ni:Sn metal or metal oxide electrocatalysts**

15 **Table S3.** Ni:Sn metal or metal oxide electrocatalyst used for formate formation during CO<sub>2</sub>RR.

| Compound                                 | Synthesis Method | Main product | Electrolyte             | FE    | E (vs RHE) | J <sub>HCOO-</sub> (mA/cm <sup>2</sup> ) | T (°C) | Reference     |
|------------------------------------------|------------------|--------------|-------------------------|-------|------------|------------------------------------------|--------|---------------|
| N <sub>4</sub> -Ni-Sn-N <sub>4</sub> SAC | Impregnation     | HCOOH        | 0.5 M KHCO <sub>3</sub> | 86.1% | -0.82 V    | 43.7                                     | 25     | <sup>40</sup> |
| Ni-doped SnO <sub>2</sub>                | Solvothermal     | HCOOH        | 1 M KOH                 | 80%   | -1.2 V     | 116                                      | 25     | <sup>41</sup> |

16

17 **4. SnO<sub>2</sub>-based model**

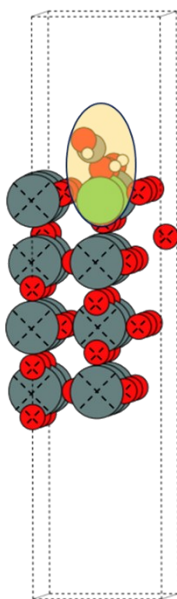

18

19 **Figure S1.** An ASE-GUI representation of the model system for the vibrational analysis. The  
 20 constrained atoms are marked with X, and the mobile atoms are highlighted in yellow.<sup>42</sup>

21

22 **Table S4.** Thermodynamic quantities for the gas phase molecules in eV.

|                       | $E_{\text{DFT}}$ | ZPE  | $\int_0^{298} C_v dT$ | TS   | G       |
|-----------------------|------------------|------|-----------------------|------|---------|
| <b>H<sub>2</sub></b>  | -6.7619          | 0.27 | 0.09                  | 0.43 | -6.832  |
| <b>H<sub>2</sub>O</b> | -14.2336         | 0.56 | 0.10                  | 0.67 | -14.24  |
| <b>CO<sub>2</sub></b> | -23.0229         | 0.31 | 0.10                  | 0.66 | -23.273 |
| <b>HCOOH</b>          | -29.8814         | 0.89 | 0.11                  | 1.05 | -29.93  |

23

24 **5. Morphological inspection for NiO, SnO<sub>2</sub>, and NiOSnO25NF**

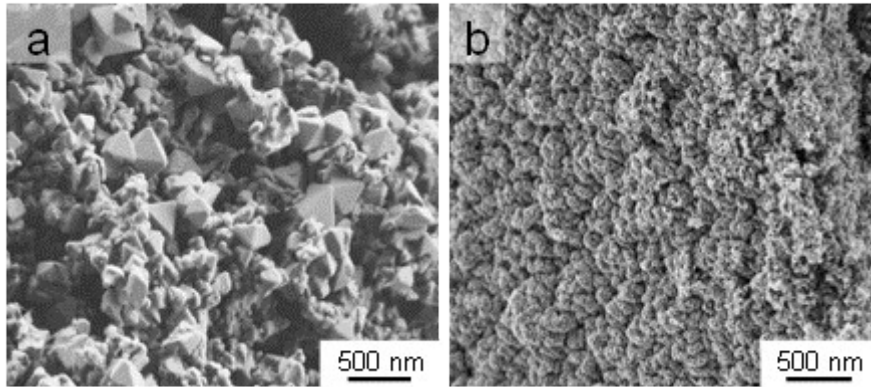

25

26 **Figure S2.** SEM image of (a) NiO and (b) SnO<sub>2</sub>.

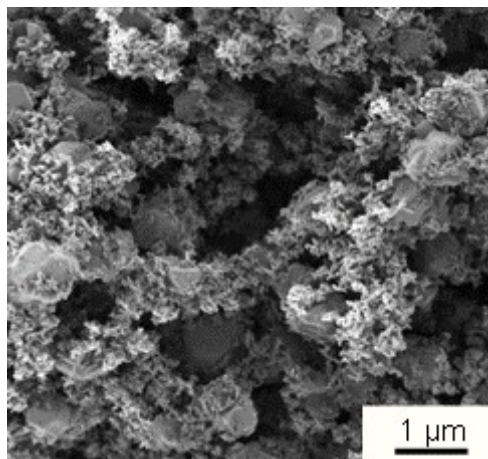

27

28 **Figure S3.** SEM image of NiOSnO25NF.

## 29 6. Interface structure between NiO and SnO<sub>2</sub> nanocrystals

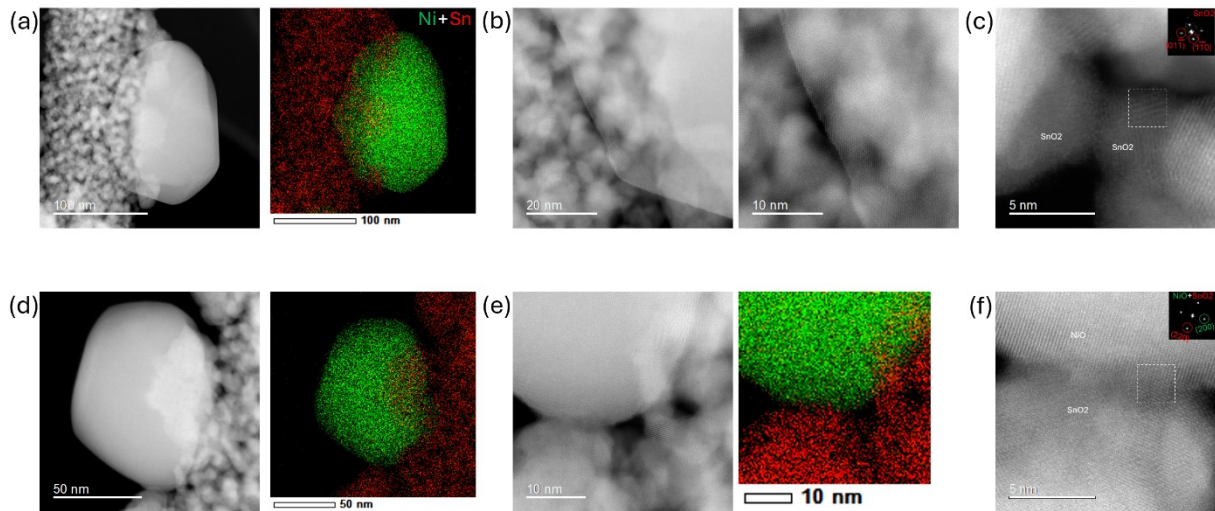

30 **Figure S4.** Interface structure between NiO and SnO<sub>2</sub> nanocrystallites. (a) ADF and EDX map of the  
31 NiO crystallite decorating a nanofiber. (b) Close-up of a NiO crystallite edge laying on the nanofiber  
32 with multiple SnO<sub>2</sub> nanocrystallites homogeneously assembled. (c) An interface between two SnO<sub>2</sub>  
33 nanocrystallites shows that the contact planes for one of the nanocrystallites observed along the zone  
34 axis [111] correspond to 011. (d) ADF and EDX map of a second example of a NiO crystallite sitting  
35 on the nanofiber. (e) A close-up ADF and EDX map showing the interaction on multiple contact points  
36 of the large NiO crystallite with the SnO<sub>2</sub> nanocrystallites. (f) Interface between the NiO crystallite and  
37 SnO<sub>2</sub> nanocrystallites. The exposed facets of the observed SnO<sub>2</sub> nanocrystallites correspond to 220  
38 planes, while the NiO crystallite facet in contact exhibits a surface with multiple steps that are oriented  
39 perpendicular to 200 planes. This illustrates that the NiO crystallite fits a non-sharp interface but is still  
40 aligned with the multigrain arrangement of the SnO<sub>2</sub> nanoparticles that construct the nanofiber.

41 7. Electrochemical impedance spectroscopy

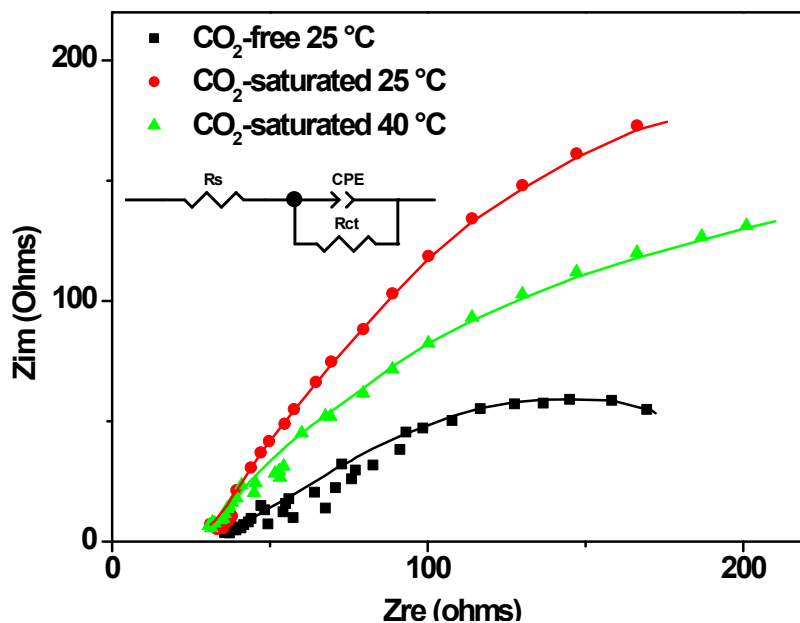

42

43 **Figure S5.** Nyquist plots for NiOSnO75NF without and saturated with CO<sub>2</sub> at different temperatures in  
 44 0.1 M KHCO<sub>3</sub>

45 **Table S5.** Electric parameters for NiOSnO75NF over various temperatures. For the experimental  
 46 results, see **Figure S5.**

| Conditions                         | R <sub>s</sub> | R <sub>ct</sub> | CPE-P   | CPE-T   |
|------------------------------------|----------------|-----------------|---------|---------|
| CO <sub>2</sub> -free (25 °C)      | 33.16          | 424.60          | 0.45191 | 0.00451 |
| CO <sub>2</sub> -saturated (25 °C) | 31.12          | 764.51          | 0.65253 | 0.00291 |
| CO <sub>2</sub> -saturated (40 °C) | 33.74          | 511.75          | 0.59552 | 0.00395 |

47 The R<sub>ct</sub> values in **Table S5** indicate that NiOSnO75NF has a higher affinity to CO<sub>2</sub>. In the absence of  
 48 CO<sub>2</sub>, the affinity to H<sub>2</sub> might be preferred.



49 **8. Linear scan voltammetry**

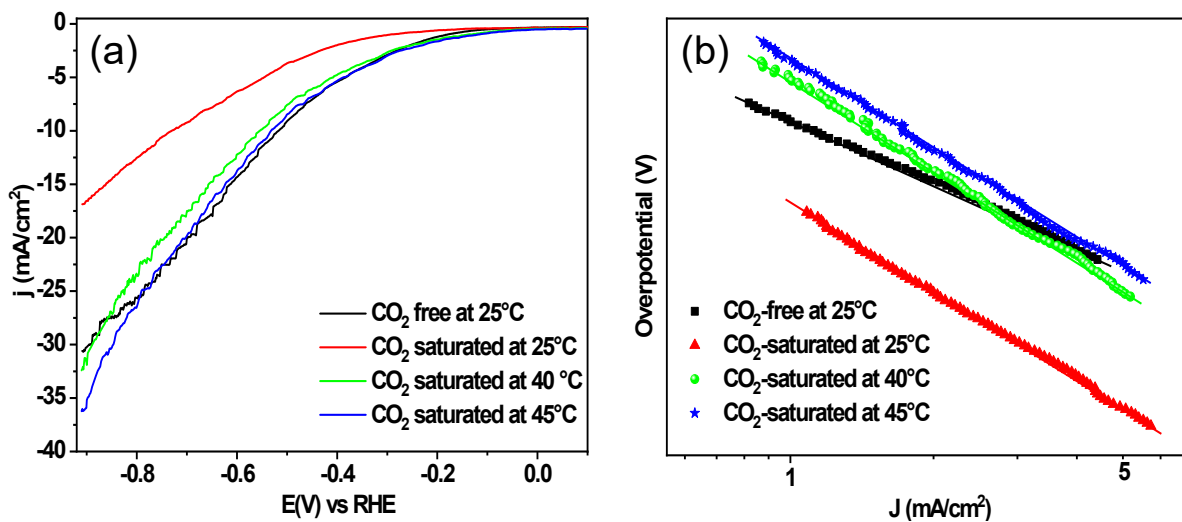

50

51 **Figure S6.** (a) Linear scan voltammetry (LSV) and (b) Tafel slopes derived from LSV in the absence  
 52 and presence of CO<sub>2</sub> at 25 °C (black line/closed square circles and red line/closed triangles), 40 °C (green  
 53 line/closed green circles), and 45°C (blue line/blue asterisks) for NiOSnO75NF in 0.1 M KHCO<sub>3</sub>.

54 **Table S6.** Tafel slopes for NiOSnO75NF over various temperatures. For the experimental results, see  
 55 **Figure S6.**

| Conditions                         | Tafel Slope<br>(mV/dec) |
|------------------------------------|-------------------------|
| CO <sub>2</sub> -free (25 °C)      | 210                     |
| CO <sub>2</sub> -saturated (25 °C) | 302                     |
| CO <sub>2</sub> -saturated (40 °C) | 293                     |
| CO <sub>2</sub> -saturated (45 °C) | 278                     |

56

57 **9. Electrochemical measurements and HCOOH fragments**

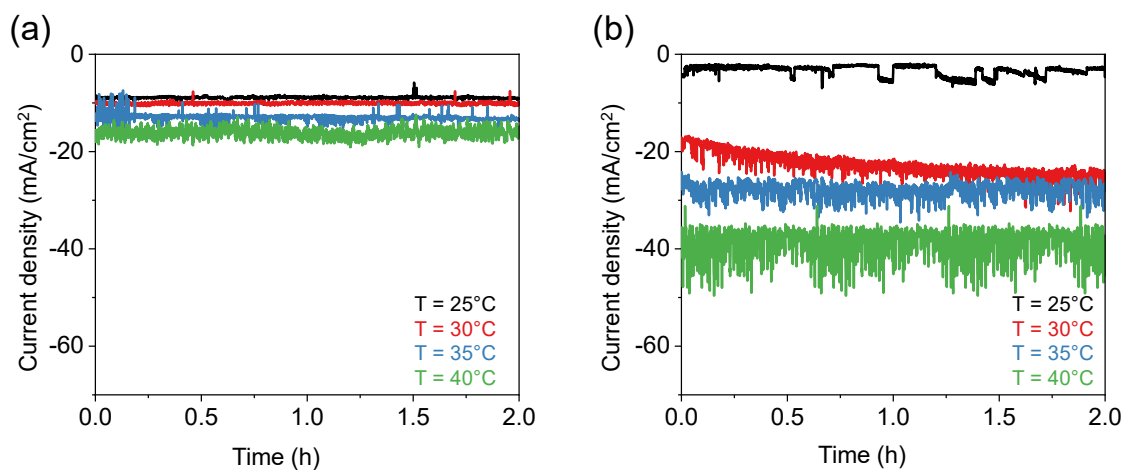

58

59 **Figure S7.** Chronoamperogram of NiOSn50NF and NiOSnO75NF in the presence of CO<sub>2</sub> over  
60 various temperatures and applied cell potentials of -0.85 vs. RHE.

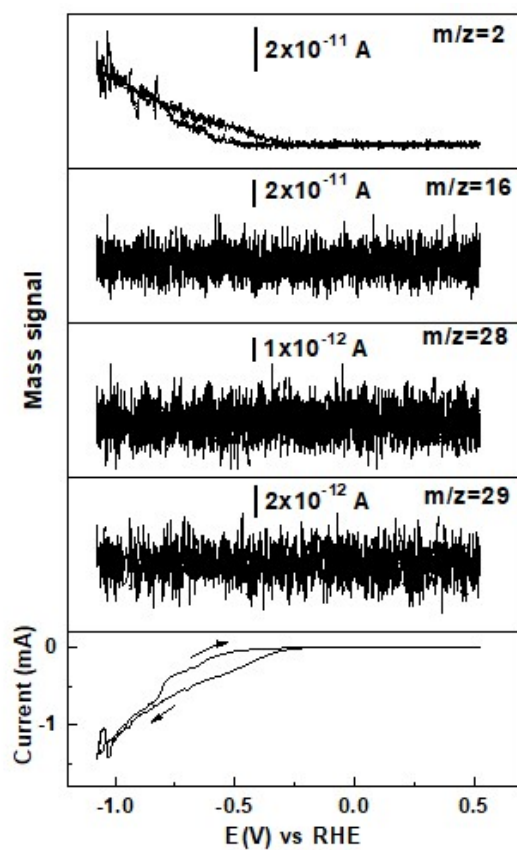

61

62 **Figure S8.** CV characteristic for NiOSnO75NF at 25 °C in the absence of CO<sub>2</sub>. The mass signal is also  
63 shown as a function of the applied potential (1 mV/s) for m/z = 2, m/z = 16, m/z = 28, and m/z = 29.

64

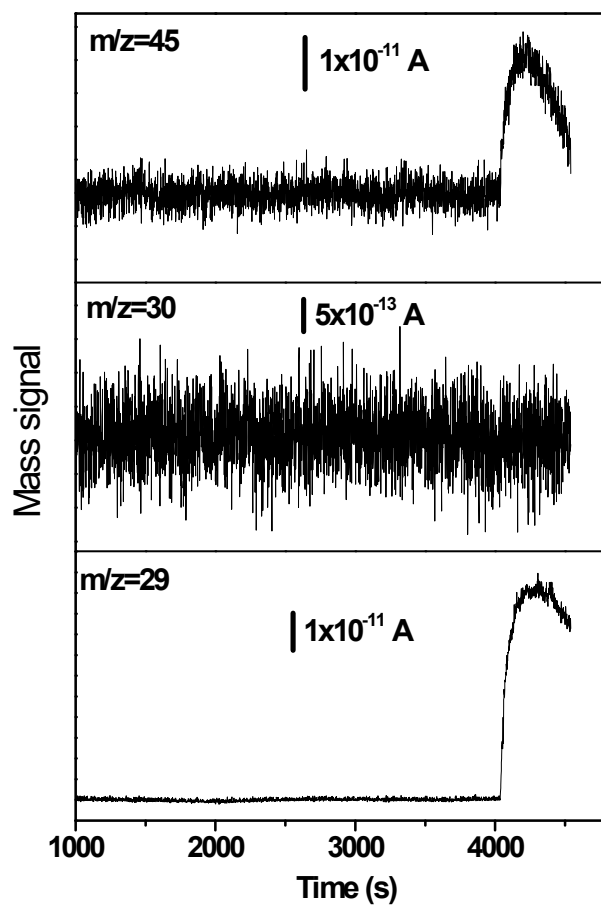

65

66 **Figure S9.** The mass signal of HCOOH for  $m/z = 45$ ,  $m/z = 30$ , and  $m/z = 29$  fragments.

67 **10. Chemical characterization with STEM-EDX**

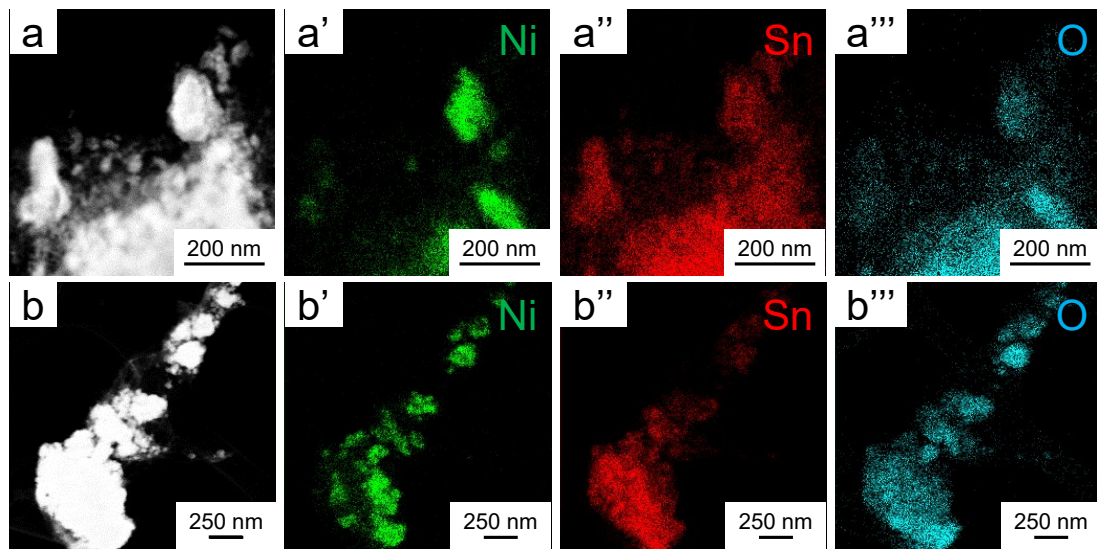

68

69 **Figure S10.** Representative STEM-ADF and STEM-EDX maps for NiOSnO75NF after 2 h (a) and 22  
70 h (b) of CO<sub>2</sub> electrolysis.

71

72 **11. Raman**

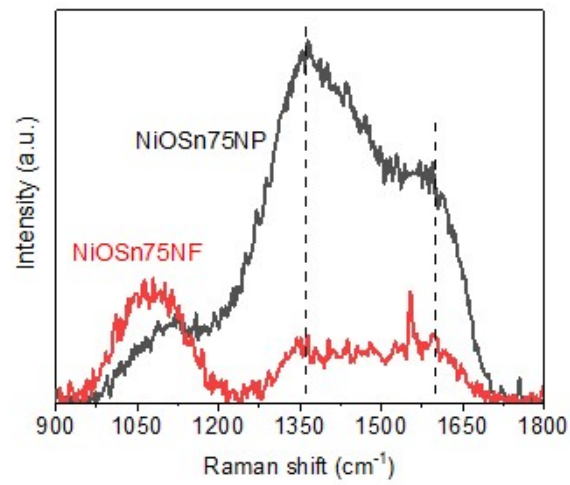

73

74 **Figure S11.** Representative Raman spectra for NiOSnO75NF and NiOSnO75NP

75 In **Figure S11**, the Raman spectrum is shown. The first peak at 1359 cm<sup>-1</sup> is identified as a defective or  
76 disordered carbon lattice.<sup>43</sup> The peak at 1596 cm<sup>-1</sup> correlates with graphitic carbon species.<sup>44,45</sup> The  
77 results demonstrate that NiOSnO75NP retains more carbon remnants than NiOSnO75NF.

78 12. STEM-ADF micrographs for NiOSnO75NF with and without surfactant

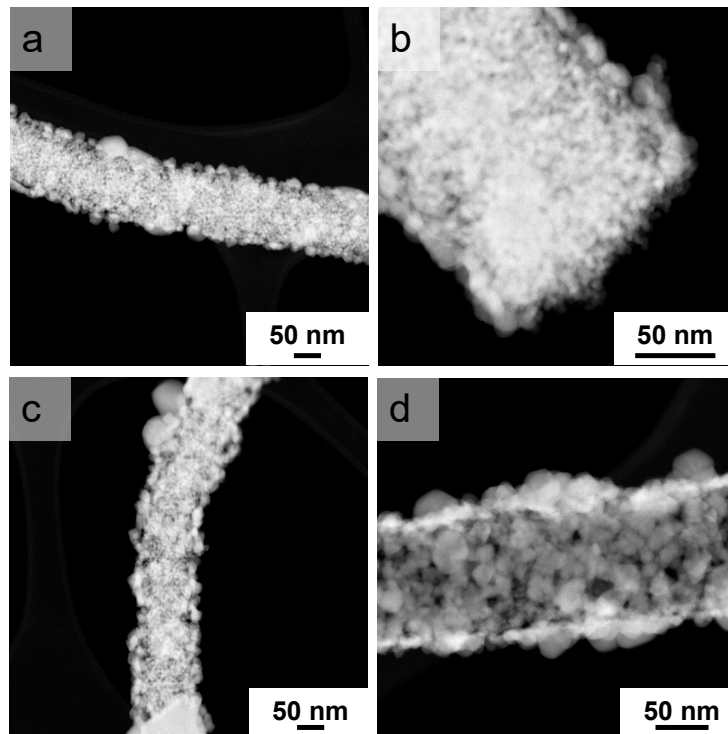

79

80 **Figure S12.** STEM-ADF micrographs of (a-b) NiOSnO75NF and (c-d) NiOSnO75 with surfactant.

81 13. CO<sub>2</sub>RR for NiOSnO75NF with surfactant

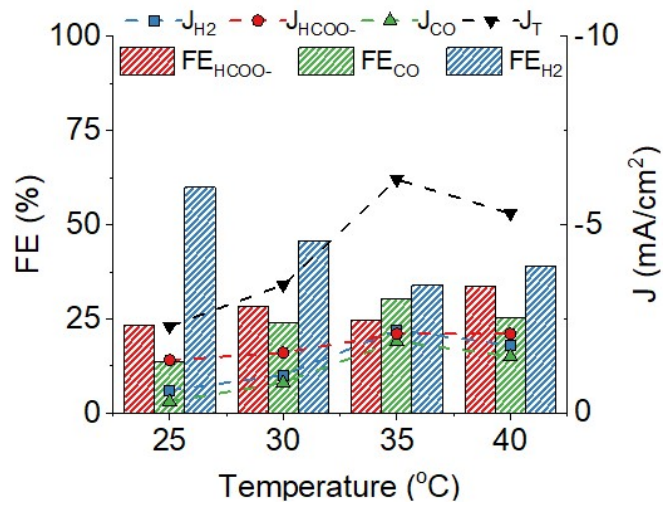

82

83 **Figure S13.** Product distribution for NiOSnO75NF with surfactant at -0.85 vs. RHE for 2 h over various  
84 temperatures, i.e., 25, 30, 35, 40 °C.

## 85 14. Computational Insights

86 **Cohesive Energy:** Cohesive energy is considered a well-known descriptor to estimate the stability of  
87 surface slabs for bulk structures.<sup>46</sup> The relative stabilities of Ni-doped SnO<sub>2</sub> are examined from the SnO<sub>2</sub>  
88 and NiO bulk structures. The cohesive energy ( $E_{coh}$ ) for an undoped SnO<sub>2</sub>(hkl) slab can be expressed as  
89 follows:

$$90 E_{coh} = \frac{E_{SnO_2(hkl)} - (N_{units}^{SnO_2} E_{bulk}^{SnO_2})}{(a + b)} \quad (1)$$

91 where  $E_{SnO_2(hkl)}$ ,  $E_{bulk}^{SnO_2}$  are the energies of a pristine SnO<sub>2</sub> slab and bulk SnO<sub>2</sub> in a tetragonal lattice,  
92 respectively.  $N_{units}^{SnO_2}$ , a and b are the number of SnO<sub>2</sub> per unit formula, Sn and O atoms, respectively.  
93 Furthermore, The cohesive energy in the case of Ni-doped SnO<sub>2</sub> systems can be given by :

$$94 E_{coh} = \frac{E_{Ni@SnO_2(hkl)} - (N_{units}^{SnO_2} E_{bulk}^{SnO_2} + N_{units}^{NiO} E_{bulk}^{NiO}) + 0.5N_{O_2} E_{O_2}}{(a + b + c)} \quad (2)$$

95 Where  $E_{Ni@SnO_2(hkl)}$ , is the total energy of the doped SnO<sub>2</sub> surface slab, and  $E_{bulk}^{NiO}$ ,  $E_{O_2}$  are the energies  
96 of bulk NiO in a cubic lattice and O<sub>2</sub> gas molecule, respectively. The factors a, b, and c are the number  
97 of Sn, Ni, and O in the Ni-doped systems. The more negative the cohesive energy is compared to pure  
98 SnO<sub>2</sub>, the more stable the doped phase.<sup>47</sup> From **Table S7**, cohesive energy per atom increases in the  
99 order 2Ni@SnO<sub>2</sub> > Ni@SnO<sub>2</sub> > SnO<sub>2</sub>. As the concentration of the Ni increases, the cohesive energy  
100 becomes more negative, implying the desirable formation of Ni-doped phases.

101

102 **Surface Formation Energy:** The surface formation energy ( $\gamma$ ) is the energy needed to create a surface  
103 (hkl) from its bulk and is often used as a descriptor for surface stability.<sup>48, 49</sup> Herein, model systems with  
104 a (110) termination of SnO<sub>2</sub> are studied because it is the most abundant surface in all experimental  
105 samples studied, as identified by experimental XRD data (**Figure 3**). A surface with low  $\gamma$  implies a  
106 stable surface. The surface formation energy for the (110) terminated SnO<sub>2</sub> is given as:



107 
$$\gamma_{SnO_2(110)} = \frac{1}{2A}(E_{SnO_2} - N_{units}^{SnO_2} E_{bulk}^{SnO_2})$$
 (3)

108 Here, A represents the surface area multiplied with a factor 2 because of the assumption of symmetric  
 109 terminations of the SnO<sub>2</sub>(110) model. Note that for the SnO<sub>2</sub>(110), there are several possible  
 110 terminations, and herein, we considered the O-terminated surface as it has garnered significant interest  
 111 in previous theoretical investigations.<sup>50-52</sup> However, in the case of Ni doping, the terminations will  
 112 become asymmetric, and its surface formation energy for SnO<sub>2</sub>(110) can then be defined as:

113 
$$\gamma = \gamma_{Ni@SnO_2(110)} - \gamma_{SnO_2(110)}$$
 (4)

114 where  $\gamma_{Ni@SnO_2(110)}$  and  $\gamma_{SnO_2(110)}$  are the surface formation energies of the Ni@SnO<sub>2</sub> and pristine SnO<sub>2</sub>  
 115 model systems (in Table S2 and Figure S11-13,  $\gamma$  or surface formation energy of the modified surface  
 116 is displayed).  $\gamma_{Ni@SnO_2(110)}$  is calculated as:

117 
$$\gamma_{Ni@SnO_2(110)} = \frac{1}{A}(E_{Ni@SnO_2(110)} - (N_{units}^{SnO_2} E_{bulk}^{SnO_2} + N_{units}^{NiO} E_{bulk}^{NiO}) + 0.5N_{O_2} E_{O_2})$$
 (5)

118 **Table S7** shows the surface formation energies of Ni-doped and pristine SnO<sub>2</sub> systems. Like the  
 119 cohesive energy, the surface energies of the Ni-doped system are low (and negative) compared to SnO<sub>2</sub>,  
 120 representing a stable surface for the doped systems. Overall, the cohesive and surface energies from the  
 121 bulk oxides and O<sub>2</sub> confirm the higher stability of the Ni-doped SnO<sub>2</sub>(110) phases over pristine  
 122 SnO<sub>2</sub>(110) phases.

123 **Table S7.** Cohesive (in eV/atom) and surface formation energies (in eV/Å<sup>2</sup>) of the slabs studied.

|                                 | <b>E<sub>coh</sub> (in eV/atom)</b> | <b>Surface Formation Energy (eV/Å<sup>2</sup>)</b> |
|---------------------------------|-------------------------------------|----------------------------------------------------|
| <b>SnO<sub>2</sub>(110)</b>     | 0.16                                | 0.09                                               |
| <b>Ni@SnO<sub>2</sub>(110)</b>  | 0.06                                | -0.02                                              |
| <b>2Ni@SnO<sub>2</sub>(110)</b> | -0.04                               | -0.21                                              |

124

## 125 **15. Computational Insights on NiO/SnO<sub>2</sub> Interface**

126 The stability of the interface between the NiO and SnO<sub>2</sub> is investigated by constructing a large 3×2  
127 supercell of the existing SnO<sub>2</sub>(110) model with four SnO<sub>2</sub> layers as previously used. Due to the  
128 complexity of the large supercell models (~450 atoms), we performed non-spin polarized calculations  
129 with the Brillouin zone sampling restricted to the  $\Gamma$ -point, keeping all other parameters unchanged. The  
130 surface formation energy (SFE) of various Ni-containing surfaces on both pristine and reduced SnO<sub>2</sub>  
131 (SnO/SnO<sub>2</sub>) are calculated using equation (4) and (5). It should be noted that the surface Pourbaix  
132 diagrams in **Figure 6** indicate that the surface tends to reduce under experimental conditions, making it  
133 crucial to consider reduced SnO<sub>2</sub> surface models when describing NiO/SnO<sub>2</sub> interfaces.

134 The different Ni-containing systems considered are: (1) Ni at adatom positions, (2) Ni doped at six-  
135 coordinated Sn surface positions (position 1), and (3) Ni doped at five-coordinated Sn surface positions  
136 (position 2). We have also constructed a NiO (Ni<sub>32</sub>O<sub>32</sub>) nanocube adsorbed and a system with all surface  
137 Sn atoms replaced by Ni atoms. (NiO/SnO<sub>2</sub> and NiO<sub>2</sub>/SnO<sub>2</sub>).

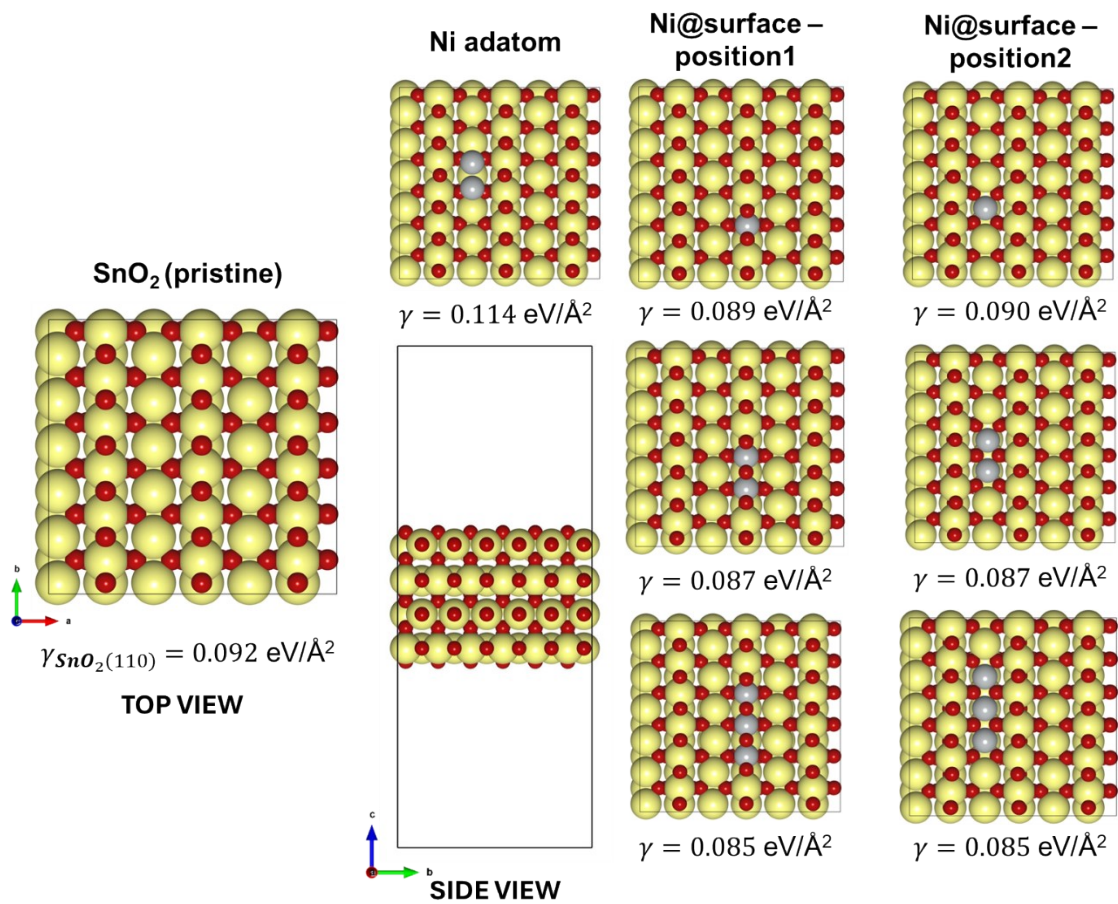

138

139 **Figure S14.** Optimized geometries of different Ni-containing systems over SnO<sub>2</sub> and their  
 140 corresponding surface formation energies in eV/Å<sup>2</sup> calculated using Eq. 4.

141

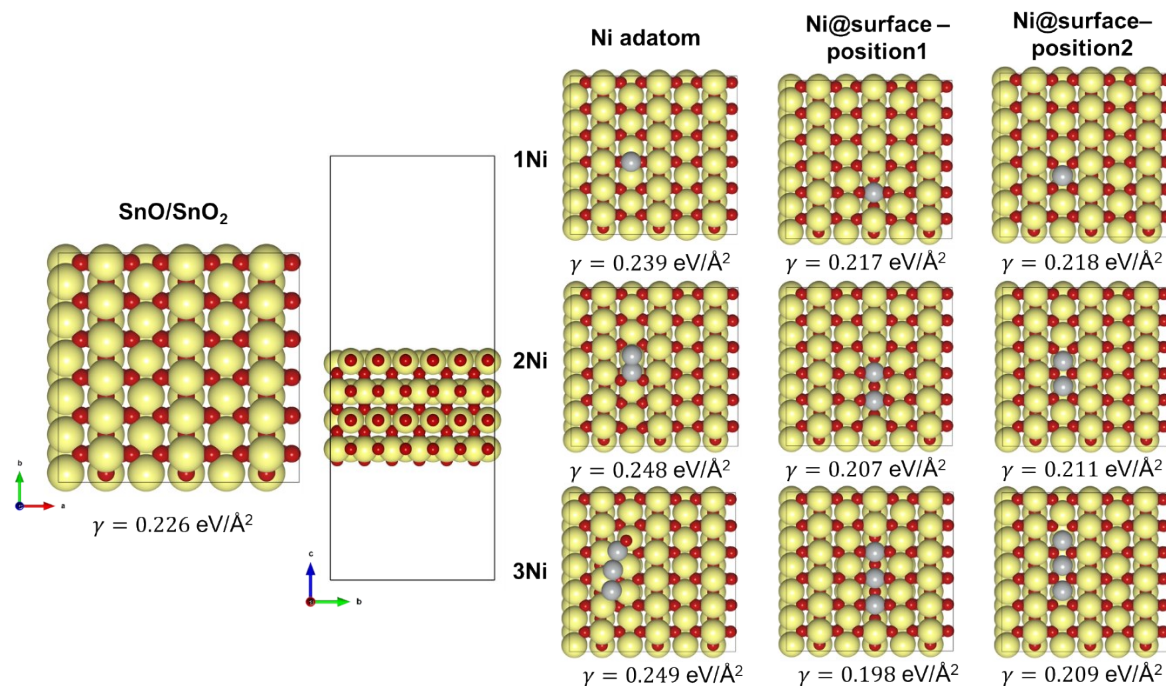

142

143 **Figure S15.** Optimized geometries of different Ni-containing systems over reduced SnO<sub>2</sub> (SnO/SnO<sub>2</sub>)  
 144 and their corresponding surface formation energies in eV/Å<sup>2</sup> calculated using Eq. 4.

145 From **Figure S14 and S15**, it is observed that Ni lowers the surface formation energy with respect to  
 146 pristine SnO<sub>2</sub>, where the Ni atoms pull and compress the surrounding atoms from their lattice positions,  
 147 similar to the small models discussed previously. The surface formation energy of 1.00 ML NiO  
 148 overlayer on a reduced surface (NiO /SnO<sub>2</sub>) was the lowest observed, with  $-0.347 \text{ eV}/\text{\AA}^2$  compared to  
 149 the various Ni-containing systems studied (**Figure S16**). The same configuration on the pristine SnO<sub>2</sub>  
 150 (NiO<sub>2</sub>/SnO<sub>2</sub>) also exhibited a lower surface energy ( $0.049 \text{ eV}/\text{\AA}^2$ ), the least among the Ni-containing  
 151 systems with pristine SnO<sub>2</sub>. Overall, the trends indicate the possible formation of a NiO phase on the  
 152 SnO<sub>2</sub> under the electrochemical conditions, as found in **Figure S4**.

153

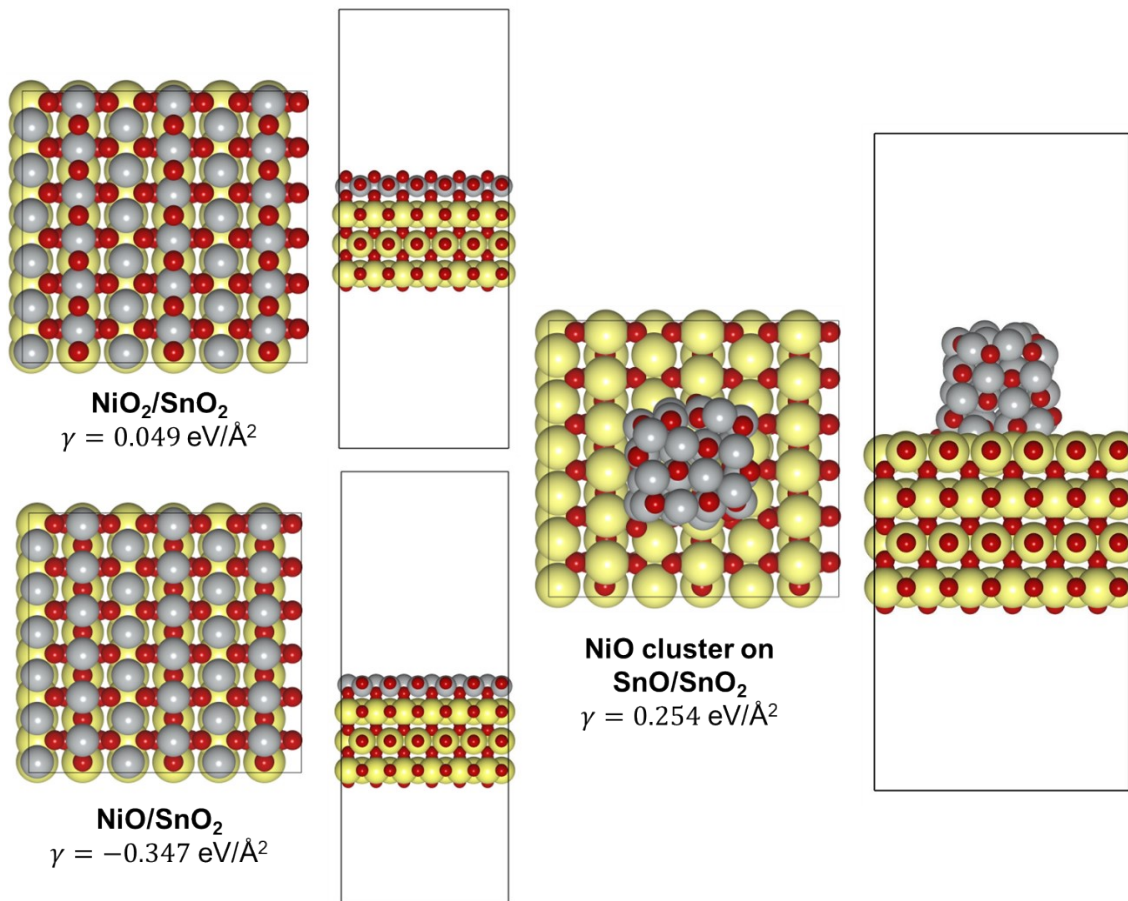

154

**Fig**

155 **re S16.** Optimized geometries of different NiO systems over pristine and reduced SnO<sub>2</sub> (SnO/SnO<sub>2</sub>)

156 models and their corresponding surface formation energies in eV/Å<sup>2</sup> calculated using Eq. 4.

158 **16. Gibbs Free Energy Vs Potential (pH=0)**

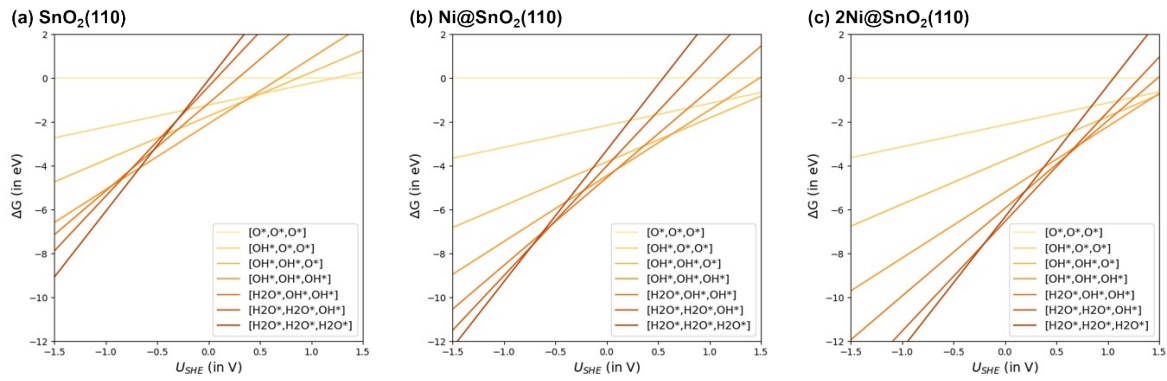

159

160 **Figure S17.** Gibbs free energy profiles as a function of  $U_{SHE}$  diagrams at  $\text{pH} = 0$  for the studied  
161  $\text{SnO}_2(110)$  models.

162

## 163 References

- 164 1 M. A. Rodriguez-Olguin, C. Flox, R. Ponce-Pérez, R. Lipin, F. Ruiz-Zepeda, J. P. Winczewski,  
165 T. Kallio, M. Vandichel, J. Guerrero-Sánchez, J. G. E. Gardeniers, N. Takeuchi and A. Susarrey-  
166 Arce, *Appl Mater Today*, 2022, **28**, 101528.
- 167 2 Z. L. Wang, J. Choi, M. Xu, X. Hao, H. Zhang, Z. Jiang, M. Zuo, J. Kim, W. Zhou, X. Meng, Q.  
168 Yu, Z. Sun, S. Wei, J. Ye, G. G. Wallace, D. L. Officer and Y. Yamauchi, *ChemSusChem*, 2020,  
169 **13**, 929–937.
- 170 3 P. Lu, Y. Yang, J. Yao, M. Wang, S. Dipazir, M. Yuan, J. Zhang, X. Wang, Z. Xie and G. Zhang,  
171 *Appl Catal B*, 2019, **241**, 113–119.
- 172 4 H. Yang, Q. Lin, C. Zhang, X. Yu, Z. Cheng, G. Li, Q. Hu, X. Ren, Q. Zhang, J. Liu and C. He,  
173 *Nat Commun*, 2020, **11**, 593.
- 174 5 C. Han, R. Zhang, Y. Ye, L. Wang, Z. Ma, F. Su, H. Xie, Y. Zhou, P. K. Wong and L. Ye, *J Mater*  
175 *Chem A Mater*, 2019, **7**, 9726–9735.
- 176 6 S. Nellaiappan and S. Sharma, *ACS Appl Energy Mater*, 2019, **2**, 2998–3003.
- 177 7 Q. X. Li, D. H. Si, W. Lin, Y. B. Wang, H. J. Zhu, Y. B. Huang and R. Cao, *Sci China Chem*,  
178 2022, **65**, 1584–1593.
- 179 8 Y. Gang, E. Sarnello, J. Pellessier, S. Fang, M. Suarez, F. Pan, Z. Du, P. Zhang, L. Fang, Y. Liu,  
180 T. Li, H. C. Zhou, Y. H. Hu and Y. Li, *ACS Catal*, 2021, **11**, 10333–10344.
- 181 9 H. Li, K. Gan, R. Li, H. Huang, J. Niu, Z. Chen, J. Zhou, Y. Yu, J. Qiu and X. He, *Adv Funct*  
182 *Mater*, 2023, **33**, 2208622.
- 183 10 J. Leverett, J. A. Yuwono, P. Kumar, T. Tran-Phu, J. Qu, J. Cairney, X. Wang, A. N. Simonov, R.  
184 K. Hocking, B. Johannessen, L. Dai, R. Daiyan and R. Amal, *ACS Energy Lett*, 2022, **7**, 920–  
185 928.
- 186 11 J. Pei, T. Wang, R. Sui, X. Zhang, D. Zhou, F. Qin, X. Zhao, Q. Liu, W. Yan, J. Dong, L. Zheng,  
187 A. Li, J. Mao, W. Zhu, W. Chen and Z. Zhuang, *Energy Environ Sci*, 2021, **14**, 3019–3028.
- 188 12 L. Liao, C. Jia, S. Wu, S. Yu, Z. Wen and S. Ci, *Nanoscale*, 2024, **16**, 8119–8131.
- 189 13 R. Zhao, Y. Wang, G. Ji, J. Zhong, F. Zhang, M. Chen, S. Tong, P. Wang, Z. Wu, B. Han and Z.  
190 Liu, *Advanced Materials*, 2023, **35**, 2205262.
- 191 14 B. Chen, B. Li, Z. Tian, W. Liu, W. P. Liu, W. Sun, K. Wang, L. Chen and J. Jiang, *Adv Energy*  
192 *Mater*, 2021, **11**, 2102152.
- 193 15 C. F. Wen, F. Mao, Y. Liu, X. Y. Zhang, H. Q. Fu, L. R. Zheng, P. F. Liu and H. G. Yang, *ACS*  
194 *Catal*, 2020, **10**, 1086–1093.
- 195 16 J. Chen, X. Wei, R. Cai, J. Ren, M. Ju, X. Lu, X. Long and S. Yang, *ACS Mater Lett*, 2022, **4**,  
196 497–504.
- 197 17 Z. Ma, T. Zhang, L. Lin, A. Han and J. Liu, *AIChE Journal*, 2023, **69**, e18161.
- 198 18 D. Sassone, J. Zeng, M. Fontana, M. A. Farkhondehfar, C. F. Pirri and S. Bocchini, *ACS Appl*  
199 *Mater Interfaces*, 2022, **14**, 42144–42152.
- 200 19 R. Ma, Y. L. Chen, Y. Shen, H. Wang, W. Zhang, S. S. Pang, J. Huang, Y. Han and Y. Zhao, *RSC*  
201 *Adv*, 2020, **10**, 22828–22835.
- 202 20 Y. Wei, J. Liu, F. Cheng and J. Chen, *J Mater Chem A*, 2019, **7**, 19651–19656.

- 203 21 J. Jiang, B. Huang, R. Daiyan, B. Subhash, C. Tsounis, Z. Ma, C. Han, Y. Zhao, L. H. Effendi,  
204 L. C. Gallington, J. N. Hart, J. A. Scott and N. M. Bedford, *Nano Energy*, 2022, **101**, 107593.
- 205 22 Y. He, W. J. Jiang, Y. Zhang, L. B. Huang and J. S. Hu, *J Mater Chem A*, 2019, **7**, 18428–18433.
- 206 23 T. Wang, J. Chen, X. Ren, J. Zhang, J. Ding, Y. Liu, K. H. Lim, J. Wang, X. Li, H. Yang, Y.  
207 Huang, S. Kawi and B. Liu, *Angewandte Chemie*, 2023, **62**, e202211174.
- 208 24 Y. Qian, Y. Liu, H. Tang and B. L. Lin, *J CO2 Util*, 2020, **42**, 101287.
- 209 25 Z. Yang, C. Yang, J. Han, W. Zhao, S. Shao, S. Li, H. Gao, H. Xie and X. Zhang, *J Mater Chem*  
210 *A*, 2021, **9**, 19681–19686.
- 211 26 Z. Li, A. Cao, Q. Zheng, Y. Fu, T. Wang, K. T. Arul, J. L. Chen, B. Yang, N. M. Adli, L. Lei, C.  
212 L. Dong, J. Xiao, G. Wu and Y. Hou, *Adv Mater*, 2021, **33**, 2005113.
- 213 27 B. Ning, M. Liu, Y. Hu, H. Jiang and C. Li, *Dalton Transactions*, 2022, **51**, 3512–3519.
- 214 28 X. Zhong, T. Yang, S. Liang, Z. Zhong and H. Deng, *Small*, 2023, **19**, 2303185.
- 215 29 N. Han, Y. Wang, J. Deng, J. Zhou, Y. Wu, H. Yang, P. Ding and Y. Li, *J Mater Chem A*, 2019,  
216 **7**, 1267–1272.
- 217 30 Z. Kuang, W. Zhao, C. Peng, Q. Zhang, Y. Xue, Z. Li, H. Yao, X. Zhou and H. Chen,  
218 *ChemSusChem*, 2020, **13**, 5896–5900.
- 219 31 L. G. Puppini, L. F. da Silva, M. Carmo, H. Varela and O. F. Lopes, *J Mater Res*, 2021, **36**, 4240–  
220 4248.
- 221 32 Z. Chen, T. Fan, Y. Q. Zhang, J. Xiao, M. Gao, N. Duan, J. Zhang, J. Li, Q. Liu, X. Yi and J. L.  
222 Luo, *Appl Catal B*, 2020, **261**, 118243.
- 223 33 G. Liu, Z. Li, J. Shi, K. Sun, Y. Ji, Z. Wang, Y. Qiu, Y. Liu, Z. Wang and P. A. Hu, *Appl Catal B*,  
224 **260**, 118134.
- 225 34 K. Bejtka, J. Zeng, A. Sacco, M. Castellino, S. Hernández, M. A. Farkhondehfar, U. Savino, S.  
226 Ansaloni, C. F. Pirri and A. Chiodoni, *ACS Appl Energy Mater*, 2019, **2**, 3081–3091.
- 227 35 Z. Wang, W. Tian, J. Zhan, Y. You, L. H. Zhang and F. Yu, *Ind Eng Chem Res*, 2023, **62**, 4940–  
228 4946.
- 229 36 Q. Zhang, Y. Zhang, J. Mao, J. Liu, Y. Zhou, D. Guay and J. Qiao, *ChemSusChem*, 2019, **12**,  
230 1443–1450.
- 231 37 K. Xu, S. Liu, Z. Cao, Y. Mao and Q. Mao, *Electrochem commun*, 2021, **128**, 107056.
- 232 38 L. Fan, Z. Xia, M. Xu, Y. Lu and Z. Li, *Adv Funct Mater*, 2018, **28**, 1706289.
- 233 39 H. Hu, L. Gui, W. Zhou, J. Sun, J. Xu, Q. Wang, B. He and L. Zhao, *Electrochim Acta*, 2018, **285**,  
234 70–77.
- 235 40 W. Xie, H. Li, G. Cui, J. Li, Y. Song, S. Li, X. Zhang, J. Y. Lee, M. Shao and M. Wei,  
236 *Angewandte Chemie*, 2021, **133**, 7458–7464.
- 237 41 M. S. Amer, H. A. AlOranj and A. M. Al-Mayouf, *J CO2 Util*, 2024, **82**, 102742.
- 238 42 A. Hjorth Larsen, J. Jørgen Mortensen, J. Blomqvist, I. E. Castelli, R. Christensen, M. Duřak, J.  
239 Friis, M. N. Groves, B. Hammer, C. Hargus, E. D. Hermes, P. C. Jennings, P. Bjerre Jensen, J.  
240 Kermode, J. R. Kitchin, E. Leonhard Kolsbjerg, J. Kubal, K. Kaasbjerg, S. Lysgaard, J.  
241 Bergmann Maronsson, T. Maxson, T. Olsen, L. Pastewka, A. Peterson, C. Rostgaard, J. Schiøtz,  
242 O. Schütt, M. Strange, K. S. Thygesen, T. Vegge, L. Vilhelmsen, M. Walter, Z. Zeng and K. W.  
243 Jacobsen, *Journal of Physics: Condensed Matter*, 2017, **29**, 273002.



- 244 43 N. A. Solopova, N. Dubrovinskaia and L. Dubrovinsky, *Appl Phys Lett*, 2013, **102**, 1–5.
- 245 44 A. Zakhurdaeva, P. I. Dietrich, H. Hölscher, C. Koos, J. G. Korvink and S. Sharma,  
246 *Micromachines (Basel)*, 2017, **8**, 1–10.
- 247 45 S. K. Jerng, D. S. Yu, J. H. Lee, C. Kim, S. Yoon and S. H. Chun, *Nanoscale Res Lett*, 2011, **6**, 1–  
248 6.
- 249 46 Q. Zhang, H. Zhang and X. L. Cheng, *Chin Physics B*, 2018, **27**, 027301.
- 250 47 J. Su, Y. Pei, Z. Yang and X. Wang, *RSC Adv*, 2015, **5**, 27229–27234.
- 251 48 Y. H. Zhao, H. Y. Su, K. Sun, J. Liu and W. X. Li, *Surf Sci*, 2012, **606**, 598–604.
- 252 49 E. Rugut, D. Joubert and G. Jones, *Comput Mater Sci*, 2021, **187**, 110099.
- 253 50 L. Braglia, M. Fracchia, P. Ghigna, A. Minguzzi, D. Meroni, R. Edla, M. Vandichel, E. Ahlberg,  
254 G. Cerrato and P. Torelli, *J Phys Chem C*, 2020, **124**, 14202–14212.
- 255 51 M. Calatayud, J. Andrés and A. Beltrán, *Surf Sci*, 1999, **430**, 213–222.
- 256 52 X. Wang, H. Qin, Y. Chen and J. Hu, *J Phys Chem C*, 2014, **118**, 28548–28561.
- 257
